# Supplementary material for: Bioinformatics Resource Manager: a systems biology web tool for microRNA and omics data integration
Source: BMC Bioinformatics. 2019 May 17;20:255. doi: 10.1186/s12859-019-2805-6 (PMC6525352; doi:10.1186/s12859-019-2805-6)
Supplement: Supplementary file 4 — Human-zebrafish integration BRM output. Output from BRM after integrating human and zebrafish mRNA files using the Integrate Tables feature. (XLSX 19 kb) [file 12859_2019_2805_MOESM4_ESM.xlsx]

## Sheet: BRM_ZF,Human_integration
Tracking_ID	gene_id	gene	locus	BAP_log2(fold_change)	BAP_test_stat	BAP_p_value	BAP_q_value	BAP_significant	BaP500_Log2FC_0	BaP500_Log2FC_1	BaP500_Log2FC_2	BaP500_Log2FC_3	Tracking_ID	gene_id	gene	locus	BAP10_log2(fold_change)	BAP10_q_value	BAP10_significant	BaP10_Log2FC_0	BaP10_Log2FC_1	BaP10_Log2FC_2
ENSG00000135046	ENSG00000135046	ANXA1	chr9:73151756-73170393	-0.953206	-1.98875	5e-05	0.000920822	yes	-0.965019	-0.647406	-1.76595	-0.686865	ENSDARG00000014594	ENSDARG00000014594	anxa1b	5:67531648-67546887	-1.34759	0.00461398	yes	-1.47614	-1.50402	-1.03152
ENSG00000140465	ENSG00000140465	CYP1A1	chr15:74719541-74725610	4.30529	10.0084	5e-05	0.000920822	yes	5.05902	4.33268	-0.377619	4.63385	ENSDARG00000026039	ENSDARG00000026039	cyp1a	18:4974675-4985566	7.45376	0.00461398	yes	7.41107	7.47853	7.54935
ENSG00000138061	ENSG00000138061	CYP1B1	chr2:37923186-38239590	1.68133	2.74887	5e-05	0.000920822	yes	1.71724	2.49872	-0.252345	1.60856	ENSDARG00000068934	ENSDARG00000068934	cyp1b1	13:42664263-42671929	3.77738	0.00461398	yes	3.86649	3.58714	3.93628
ENSG00000275993	ENSG00000275993	CH507-42P11.8	chr21:6111133-6123739	-2.24604	-4.85658	5e-05	0.000920822	yes	-2.65789	-1.43714	-2.94892	-2.427	ENSDARG00000058606	ENSDARG00000058606	SIK1	9:9169114-9178227	1.01017	0.00461398	yes	0.930696	1.01014	1.16098
ENSG00000132002	ENSG00000132002	DNAJB1	chr19:14514769-14565980	-0.81374	-1.98604	5e-05	0.000920822	yes	-1.00681	-0.793858	-1.05073	-0.477043	ENSDARG00000041394	ENSDARG00000041394	dnajb1b	1:56270007-56290011	0.747213	0.00461398	yes	0.724255	0.903561	0.685093
ENSG00000105755	ENSG00000105755	ETHE1	chr19:43506718-43536130	-1.00099	-2.7397	5e-05	0.000920822	yes	-1.14184	-1.48039	-0.708324	-0.798307	ENSDARG00000005713	ENSDARG00000005713	ethe1	16:57829772-57846922	1.60512	0.00461398	yes	1.55087	1.80328	1.52493
ENSG00000204389	ENSG00000204389	HSPA1A	chr6:31815463-31817946	-1.34465	-3.61918	5e-05	0.000920822	yes	-1.7264	-1.00178	-2.30713	-0.807569	ENSDARG00000055723	ENSDARG00000055723	hsp70l	8:5006698-5009452	1.071	0.00461398	yes	0.871845	1.53464	0.760911
ENSG00000204388	ENSG00000204388	HSPA1B	chr6:31827734-31830255	-1.34457	-3.93306	5e-05	0.000920822	yes	-1.79327	-0.924674	-2.09172	-0.929166	ENSDARG00000055723	ENSDARG00000055723	hsp70l	8:5006698-5009452	1.071	0.00461398	yes	0.871845	1.53464	0.760911
ENSG00000173110	ENSG00000173110	HSPA6	chr1:161505429-161605662	-2.63335	-4.25331	5e-05	0.000920822	yes	-3.46198	-2.02963	-4.28537	-1.95609	ENSDARG00000055723	ENSDARG00000055723	hsp70l	8:5006698-5009452	1.071	0.00461398	yes	0.871845	1.53464	0.760911
ENSG00000186832	ENSG00000186832	KRT16	chr17:41609777-41615899	-1.32704	-3.60181	5e-05	0.000920822	yes	-1.22217	-1.51378	-2.58564	-0.623891	ENSDARG00000036840	ENSDARG00000036840	krt15	11:11635466-11764765	-0.776126	0.00461398	yes	-0.748083	-0.791218	-0.709423
ENSG00000186832	ENSG00000186832	KRT16	chr17:41609777-41615899	-1.32704	-3.60181	5e-05	0.000920822	yes	-1.22217	-1.51378	-2.58564	-0.623891	ENSDARG00000090268	ENSDARG00000090268	KRT23 (12 of 15)	19:5963566-5970135	-0.62606	0.0422498	yes	-0.582488	-0.506902	-0.715659
ENSG00000128422	ENSG00000128422	KRT17	chr17:41619436-41624842	-1.7833	-3.96932	5e-05	0.000920822	yes	-1.61549	-1.7662	-3.29885	-1.18401	ENSDARG00000036840	ENSDARG00000036840	krt15	11:11635466-11764765	-0.776126	0.00461398	yes	-0.748083	-0.791218	-0.709423
ENSG00000128422	ENSG00000128422	KRT17	chr17:41619436-41624842	-1.7833	-3.96932	5e-05	0.000920822	yes	-1.61549	-1.7662	-3.29885	-1.18401	ENSDARG00000090268	ENSDARG00000090268	KRT23 (12 of 15)	19:5963566-5970135	-0.62606	0.0422498	yes	-0.582488	-0.506902	-0.715659
ENSG00000161647	ENSG00000161647	MPP3	chr17:43800798-43833170	-1.68442	-2.04362	5e-05	0.000920822	yes	-1.47606	-1.39262	-2.69324	-1.51642	ENSDARG00000062667	ENSDARG00000062667	MPP3 (2 of 2)	12:17311638-17349353	0.836598	0.0461122	yes	0.77863	0.80366	0.998501
ENSG00000185630	ENSG00000185630	PBX1	chr1:164555583-164899296	1.29508	1.40919	5e-05	0.000920822	yes	1.08816	0.478856	1.84815	1.4306	ENSDARG00000089610	ENSDARG00000089610	pbx1a	2:19717558-19749261	-0.681136	0.0199581	yes	-0.644824	-0.804222	-0.526759
ENSG00000148735	ENSG00000148735	PLEKHS1	chr10:113751453-113783429	1.0955	2.40448	5e-05	0.000920822	yes	0.855803	0.891738	1.7693	0.559155	ENSDARG00000090526	ENSDARG00000090526	PLEKHS1 (1 of 3)	12:32206782-32213077	2.18934	0.014733	yes	1.9918	2.07165	2.52619
ENSG00000083845	ENSG00000083845	RPS5	chr19:58386399-58394806	-0.727683	-2.13059	5e-05	0.000920822	yes	-0.778268	-1.26544	-0.661965	-0.350271	ENSDARG00000043453	ENSDARG00000043453	rps5	15:38602103-38608917	-0.634848	0.0253343	yes	-0.61645	-0.513762	-0.699242
ENSG00000142178	ENSG00000142178	SIK1	chr21:43414514-43427128	-2.47571	-2.93597	5e-05	0.000920822	yes	-2.33121	-2.03655	-3.18869	-2.58229	ENSDARG00000058606	ENSDARG00000058606	SIK1	9:9169114-9178227	1.01017	0.00461398	yes	0.930696	1.01014	1.16098
ENSG00000166347	ENSG00000166347	CYB5A	chr18:74250846-74292016	0.689843	1.76614	0.0001	0.00170374	yes	0.587669	0.349808	0.79653	0.954794	ENSDARG00000055643	ENSDARG00000055643	cyb5a	24:3234918-3241719	1.72668	0.00461398	yes	1.66457	1.85242	1.73799
ENSG00000181061	ENSG00000181061	HIGD1A	chr3:42692662-43060211	0.673695	1.9186	0.0001	0.00170374	yes	0.645922	1.02561	0.160769	0.733071	ENSDARG00000022303	ENSDARG00000022303	hig1	2:1970654-1975857	1.5402	0.00461398	yes	1.54673	1.50447	1.64646
ENSG00000184557	ENSG00000184557	SOCS3	chr17:78356777-78360077	-1.03471	-2.1723	0.0001	0.00170374	yes	-1.2012	-0.526272	-1.97793	-0.812633	ENSDARG00000025428	ENSDARG00000025428	socs3a	3:58237024-58239849	1.32471	0.00461398	yes	1.36228	1.30877	1.38341
ENSG00000081277	ENSG00000081277	PKP1	chr1:201283451-201332993	-0.815845	-1.76476	0.00015	0.00239372	yes	-1.02771	-1.85981	-0.312629	-0.512238	ENSDARG00000052705	ENSDARG00000052705	pkp1	6:54666463-54709200	-0.874482	0.00461398	yes	-0.786865	-0.936134	-0.82383
ENSG00000111261	ENSG00000111261	MANSC1	chr12:12326055-12350541	0.652797	1.77561	0.0002	0.00299194	yes	0.439959	0.338881	0.965371	0.778161	ENSDARG00000036851	ENSDARG00000036851	MUC17	19:47005863-47012463	-1.47777	0.00461398	yes	-1.42301	-1.56545	-1.37016
ENSG00000117360	ENSG00000117360	PRPF3	chr1:150321475-150353195	-0.776338	-1.8097	0.0004	0.00515795	yes	-0.233411	-0.456448	-1.43566	-1.37218	ENSDARG00000058430	ENSDARG00000058430	PRPF3 (1 of 2)	16:10974183-10995156	-1.62617	0.00461398	yes	-1.7279	-1.64302	-1.44124
ENSG00000017483	ENSG00000017483	SLC38A5	chrX:48458536-48470256	-1.12112	-1.76604	0.00075	0.00853246	yes	-1.58975	-0.639736	-1.66941	-0.861177	ENSDARG00000009901	ENSDARG00000009901	SLC38A5 (2 of 2)	8:26468723-26478746	0.834151	0.0118645	yes	1.02256	0.727384	0.817087
ENSG00000050327	ENSG00000050327	ARHGEF5	chr7:144186082-144380632	-1.1646	-1.67034	0.00085	0.00938259	yes	-0.993545	-1.20648	-1.85366	-0.805675	ENSDARG00000076383	ENSDARG00000076383	ARHGEF5	16:19677194-19699399	-0.708372	0.00461398	yes	-0.581883	-0.885579	-0.59652
ENSG00000140279	ENSG00000140279	DUOX2	chr15:45092649-45201175	1.29374	1.43487	0.00105	0.011112	yes	1.6005	0.889295	1.08519	1.48548	ENSDARG00000062632	ENSDARG00000062632	duox	25:32936630-32997395	-1.64801	0.00461398	yes	-1.33142	-1.97935	-1.62394
ENSG00000170477	ENSG00000170477	KRT4	chr12:52806548-52814551	-0.591859	-1.55093	0.00105	0.011112	yes	-1.19972	-1.84455	-0.219341	0.112621	ENSDARG00000058462	ENSDARG00000058462	zgc:158846	6:39267594-39275123	0.795192	0.0406088	yes	0.764721	1.04012	0.63087
ENSG00000137364	ENSG00000137364	TPMT	chr6:18128310-18155074	0.700107	1.6586	0.00155	0.0150178	yes	0.524234	0.483055	0.761653	0.976146	ENSDARG00000055974	ENSDARG00000055974	TPMT (1 of 2)	19:49196460-49204831	1.18769	0.00841373	yes	0.960662	1.47385	1.16259
ENSG00000105852	ENSG00000105852	PON3	chr7:95359943-95396368	0.735863	1.52697	0.00175	0.0164144	yes	0.705753	0.653518	0.998763	0.545257	ENSDARG00000032496	ENSDARG00000032496	zgc:91887	16:26885892-26895558	0.769686	0.0224996	yes	0.601347	0.882096	0.888559
ENSG00000162849	ENSG00000162849	KIF26B	chr1:245154984-245709431	-1.83035	-1.42027	0.00195	0.017759	yes	-1.51533	-2.22497	-1.54453	-2.1959	ENSDARG00000024575	ENSDARG00000024575	KIF26B (2 of 2)	20:35038753-35064852	-0.76449	0.0118645	yes	-0.782528	-0.734968	-0.696157
ENSG00000135480	ENSG00000135480	KRT7	chr12:52232519-52309163	-0.746213	-1.62026	0.00195	0.017759	yes	-0.835006	-1.36589	-0.781645	-0.227034	ENSDARG00000058462	ENSDARG00000058462	zgc:158846	6:39267594-39275123	0.795192	0.0406088	yes	0.764721	1.04012	0.63087
ENSG00000149257	ENSG00000149257	SERPINH1	chr11:75562055-75572783	-0.677922	-1.46579	0.00265	0.0222521	yes	-0.73386	-0.838743	-0.623745	-0.533546	ENSDARG00000019949	ENSDARG00000019949	hsp47	15:28732297-28736597	1.00609	0.00461398	yes	1.04764	1.00556	1.0457
ENSG00000185022	ENSG00000185022	MAFF	chr22:38111494-38216511	-0.634031	-1.52917	0.00295	0.0240831	yes	-0.689912	-0.826356	-1.49293	0.0543066	ENSDARG00000028957	ENSDARG00000028957	maff	12:20437067-20442960	0.622612	0.0461122	yes	0.625146	0.531609	0.780844
ENSG00000113924	ENSG00000113924	HGD	chr3:120628172-120682571	1.14494	1.38289	0.0038	0.0291182	yes	1.2391	1.40704	0.943677	0.933283	ENSDARG00000058005	ENSDARG00000058005	hgd	24:24567434-24578994	0.932468	0.00461398	yes	0.786621	1.21383	0.839259
ENSG00000146425	ENSG00000146425	DYNLT1	chr6:158636473-158644739	0.463801	1.38401	0.0065	0.0430698	yes	0.546921	0.277703	0.40947	0.599565	ENSDARG00000045909	ENSDARG00000045909	dynlt1	4:96709-100717	-3.32436	0.00461398	yes	-3.499	-3.85973	-2.75748
ENSG00000109971	ENSG00000109971	HSPA8	chr11:123057488-123063230	-0.82875	-1.42177	0.0079	0.0497968	yes	-0.842726	-0.754009	-1.05442	-0.689588	ENSDARG00000037403	ENSDARG00000037403	hspa8l	15:18550717-18566719	1.36429	0.00461398	yes	1.39287	1.62105	1.11496
